# Supplementary material
Source: HighWire-hosted journal article supplement (http://molpharm.aspetjournals.org/highwire/filestream/89349/field_highwire_adjunct_files/11/995_supp_data.pdf)
Supplement: 995_supp_data.pdf [file 995_supp_data.pdf]

# Molecular Pharmacology

MOLPHARM-AR-2024-000995

## Supporting Information

### Probing the Chemical Space of Guanidino-Carboxylic Acids to Identify the First Blockers of the creatine-transporter-1

Clemens V Farr, Yi Xiao, Ali El-Kasaby, Manuel Schupp, Matej Hotka, Giovanni di Mauro, Amy Clarke, Miryam Pastor Fernandez, Christoph Klade, Walter Sandtner, Thomas Stockner, Nuno Maulide, Michael Freissmuth

#### Table of contents:

|                           |             |
|---------------------------|-------------|
| Supplementary Fig. 1 .... | page S2     |
| Supplementary Table 1 ... | pages S3-S4 |
| Supplementary Table 1 ... | pages S5-S6 |
| Supplementary Fig. 2 .... | page S8     |
| Caption of PDB files ...  | page S9     |

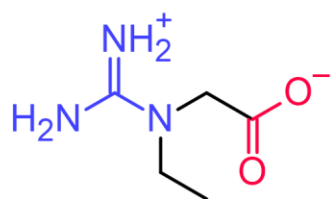

N-ethyl-N-amidinoglycine

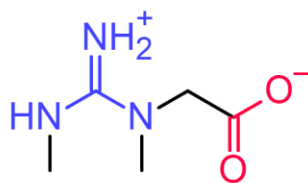N-methyl-amidino  
-N-methyl-glycine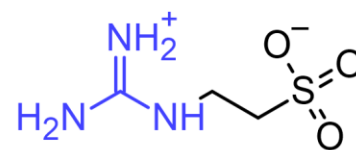

Taurocyamine

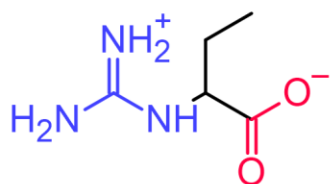

Alpha-GBA

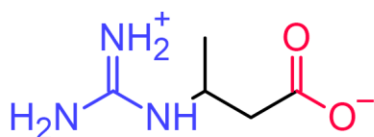

Beta-GBA

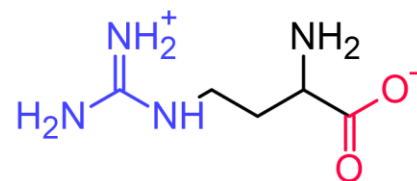

2-amino-4-GBA

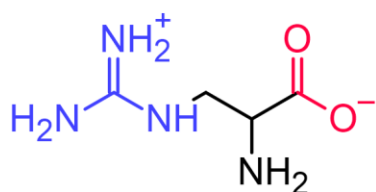

Alpha-amino-beta-GPA

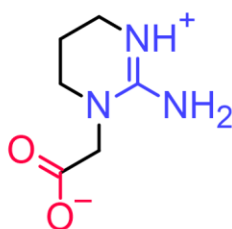

CMIP

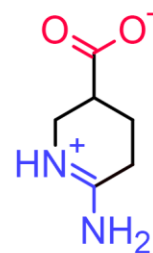

ATPCA II

**Supplementary Figure 1. Structures of compounds previously reported to inhibit CRT-1 or creatine uptake.** Guanidino groups (and the related group in ATPCA II) are highlighted in blue, carboxylate groups are visualized in red. Details and references are given in Supplementary Table 1. GBA = guanidinobutyrate; ATPCA II = 2-amino-3,4,5,6-tetrahydropyridine-5-carboxylic acid; CMIP = 1-carboxy-methyl-2-imino-hexahydro-pyrimidine. The structures of the other previously reported inhibitors - i.e., GAA/guanidinoacetate, GPA guanidinopropionate, GBA/4-guanidinobutyrate; ATPCA/ 2-amino-1,4,5,6-tetrahydropyrimidine-5-carboxylic acid and cyclocreatine – are shown in Figure 1.

**Supplementary TABLE 1.**  
**Compilation of compounds, which were tested for inhibition of creatine uptake and inhibited uptake by  $\geq 25\%$ .**

| Compound                                                           |                | Tested cell/tissue preparation                  | $[^3\text{H}]/[^{14}\text{C}]\text{Cr}$<br>$\mu\text{M}$ | Uptake<br>% of control      | Reference                  |
|--------------------------------------------------------------------|----------------|-------------------------------------------------|----------------------------------------------------------|-----------------------------|----------------------------|
| Name                                                               | $\mu\text{M}$  |                                                 |                                                          |                             |                            |
| 1-carboxy-methyl-2-imino-hexahydro-pyrimidine (CMIP)               | 50             | Rat skeletal muscle                             | 0.21 $\mu\text{mol}$<br>injected i.p                     | 57                          | Fitch and Chevli, 1980     |
|                                                                    |                | Rat heart                                       |                                                          | 58                          |                            |
| 2-amino-1,4,5,6-tetrahydro-pyrimidine-5-carboxylic acid (ATPCA-II) | 1000           | tsA201 cells                                    | 0.2                                                      | 25                          | Al-Khawaja et al., 2018    |
| 2-amino-4-guanidino-butyrate                                       | 1000           | Astroglia rich culture                          | 10                                                       | 74                          | Möller and Hamprecht, 1989 |
| $\alpha$ -amino- $\beta$ -guanidino-propionate                     | 1000           | Astroglia rich culture                          | 10                                                       | 63                          | Möller and Hamprecht, 1989 |
|                                                                    | 5000           | Cos-7 cells                                     | 50                                                       | 40                          | Guimbal and Kilimann, 1993 |
| $\beta$ -guanidino-propionate                                      | 15             | Brush border membrane vesicles from enterocytes | 10                                                       | 55                          | Tosco et al., 2004         |
|                                                                    |                | Chicken enterocytes                             | 1                                                        | 58                          | Peral et al., 2002         |
|                                                                    | 50             | Rat skeletal muscle                             | 0.21 $\mu\text{mol}$<br>injected i.p                     | 50                          | Fitch and Chevli, 1980     |
|                                                                    |                | Rat heart                                       |                                                          | 44                          |                            |
|                                                                    |                | Brush border membrane vesicles from enterocytes | 10                                                       | 25                          | Tosco et al., 2004         |
|                                                                    | 500            | Brush border membrane vesicles from enterocytes | 10                                                       | 5                           | Daly and Seifter, 1980     |
|                                                                    |                | Uterine smooth muscle                           | 50                                                       | 12                          |                            |
|                                                                    | 1000           | Rat skeletal muscle                             | 100                                                      | 17                          | Fitch et al., 1968         |
|                                                                    |                | Human erythrocytes                              | 1.7 – 4.2                                                | 70                          | Ku and Passow, 1980        |
|                                                                    |                | Astroglia rich culture                          | 10                                                       | 4                           | Möller and Hamprecht, 1989 |
|                                                                    |                | Hela cells                                      | 0.5                                                      | 16                          | Saltarelli et al., 1996    |
|                                                                    |                | TM-BBB4 cells                                   | 9.1                                                      | 5                           | Ohtsuki et al., 2002       |
|                                                                    |                | Chicken enterocytes                             | 1                                                        | 16                          | Peral et al., 2002         |
|                                                                    |                | Rat ileum                                       | 2                                                        | 17                          | Peral et al., 2002         |
| Rat skeletal muscle giant sarcolemmal vesicles                     |                | 10                                              | 25                                                       | Walzel et al., 2002         |                            |
| TR-iBRB2 cells                                                     |                | 18.2                                            | 9                                                        | Nakashima et al., 2004      |                            |
| Hippocampal neurons                                                |                | 20                                              | 6                                                        | Dodd et al., 2010           |                            |
| 5000                                                               | Macrophages    | 21.7 - 43.4                                     | 20                                                       | Loike et al., 1986          |                            |
|                                                                    | Cos-7 cells    | 50                                              | 10                                                       | Guimbal, and Kilimann, 1993 |                            |
|                                                                    |                |                                                 | 6                                                        | Sora et al., 1994           |                            |
| HEK293 cells                                                       | 0.5            | 4                                               | Dodd et al., 1999                                        |                             |                            |
| 10000                                                              | Uterine smooth | 1000                                            | 27                                                       | Daly and Seifter, 1980      |                            |

|  |  |        |  |  |  |
|--|--|--------|--|--|--|
|  |  | muscle |  |  |  |
|--|--|--------|--|--|--|

Supplementary TABLE 1. Continued

| Compound                                      |               | Tested cell/tissue preparation                          | $[^3\text{H}]/[^{14}\text{C}]\text{Cr}$<br>$\mu\text{M}$ | Uptake<br>% of control                | Reference                   |                        |
|-----------------------------------------------|---------------|---------------------------------------------------------|----------------------------------------------------------|---------------------------------------|-----------------------------|------------------------|
| Name                                          | $\mu\text{M}$ |                                                         |                                                          |                                       |                             |                        |
| cyclo-<br>creatine                            | 1000          | Chicken enterocyte                                      | 1                                                        | 50                                    | Peral et al., 2002          |                        |
|                                               |               | Rat ileum                                               | 2                                                        | 54                                    | Peral et al., 2002          |                        |
|                                               |               | Rat skeletal muscle<br>giant sarcolemmal<br>vesicles    | 10                                                       | 51                                    | Walzel et al., 2002         |                        |
|                                               |               | Hippocampal neurons                                     | 20                                                       | 24                                    | Dodd et al., 2010           |                        |
|                                               | 5000          | HEK293 cells                                            | 0.5                                                      | 16                                    | Dodd et al., 1999           |                        |
| dipyridamol                                   | 20            | Human erythrocytes                                      | 1.7-4.2                                                  | 55                                    | Ku and Passow, 1980         |                        |
| DL- $\alpha$ -<br>guanidino-<br>butyrate      | 50            | Rat skeletal muscle                                     | 0.21 $\mu\text{mol}$<br>injected i.p.                    | 69                                    | Fitch and Chevli, 1980      |                        |
|                                               |               | Rat heart                                               |                                                          | 63                                    |                             |                        |
| DL- $\beta$ -<br>guanidino-<br>butyrate       | 50            | Rat skeletal muscle                                     | 0.21 $\mu\text{mol}$<br>injected i.p.                    | 47                                    | Fitch and Chevli, 1980      |                        |
|                                               |               | Rat heart                                               |                                                          | 49                                    |                             |                        |
| $\gamma$ -guanidino-<br>-butyrate             | 15            | Brush border mem-<br>brane vesicles from<br>enterocytes | 10                                                       | 90 *                                  | Tosco et al., 2004          |                        |
|                                               | 50            |                                                         |                                                          | 75                                    |                             |                        |
|                                               |               |                                                         | Rat skeletal muscle                                      | 0.21 $\mu\text{mol}$<br>injected i.p. | 98 *                        | Fitch and Chevli, 1980 |
|                                               |               |                                                         | Rat heart                                                |                                       | 109*                        |                        |
|                                               | 500           | Brush border<br>membrane vesicles<br>from enterocytes   | 10                                                       | 40                                    | Tosco et al., 2004          |                        |
|                                               | 1000          | Human erythrocytes                                      | 1.7-4.2                                                  | 100 *                                 | Ku and Passow, 1980         |                        |
|                                               |               | Hela cells                                              | 0.5                                                      | 42                                    | Saltarelli et al., 1996     |                        |
|                                               |               | TR-iBRB2 cells                                          | 18                                                       | 28                                    | Nakashima et al., 2004      |                        |
|                                               |               | Hippocampal neurons                                     | 20                                                       | 22                                    | Dodd et al., 2010           |                        |
|                                               | 5000          | Cos-7 cells                                             | 50                                                       | 10                                    | Guimbal, and Kilimann, 1993 |                        |
| 31                                            |               |                                                         |                                                          | Sora et al., 1994                     |                             |                        |
| 26                                            |               |                                                         |                                                          | Dodd et al., 1999                     |                             |                        |
| guanidino<br>-acetate                         | 50            | Rat skeletal muscle                                     | 0.21 $\mu\text{mol}$<br>injected i.p.                    | 71                                    | Fitch and Chevli, 1980      |                        |
|                                               |               | Rat heart                                               |                                                          | 95 *                                  |                             |                        |
|                                               | 1000          | Rat skeletal muscle                                     | 100                                                      | 74                                    | Fitch et al., 1968          |                        |
|                                               |               | Human erythrocytes                                      | 1.7-4.2                                                  | 100 *                                 | Ku and Passow, 1980         |                        |
|                                               |               | Astroglia rich culture                                  | 10                                                       | 47                                    | Möller and Hamprecht, 1989  |                        |
|                                               |               | Hela cells                                              | 0.5                                                      | 69                                    | Saltarelli et al., 1996     |                        |
|                                               |               | TM-BBB4 cells                                           | 9.1                                                      | 30                                    | Ohtsuki et al., 2002        |                        |
|                                               |               | Rat skeletal muscle<br>giant sarcolemmal<br>vesicles    | 10                                                       | 73                                    | Walzel et al., 2002         |                        |
|                                               |               | Hippocampal neurons                                     | 20                                                       | 38                                    | Dodd et al., 2010           |                        |
|                                               | 4000          | Macrophages                                             | 21.7-43.4                                                | 59                                    | Loike et al., 1986          |                        |
|                                               | 5000          | Cos-7 cells                                             | 50                                                       | 30                                    | Guimbal and Kilimann, 1993  |                        |
|                                               |               |                                                         |                                                          | 41                                    | Sora et al., 1994           |                        |
|                                               |               |                                                         |                                                          | 41                                    | Dodd et al., 1999           |                        |
| N-methyl-<br>amidino-N-<br>methyl-<br>glycine | 50            | Rat skeletal muscle                                     | 0.21 $\mu\text{mol}$<br>injected i.p.                    | 57                                    | Fitch and Chevli, 1980      |                        |
| Phloretin                                     | 1000          | Human erythrocytes                                      | 1.7-4.2                                                  | 20                                    | Ku and Passow, 1980         |                        |
| Phlorizin                                     | 1000          | Human erythrocytes                                      | 1.7-4.2                                                  | 70                                    | Ku and Passow, 1980         |                        |
| Taurocyamin<br>e                              | 1000          | Astroglia rich culture                                  | 10                                                       | 47                                    | Möller and Hamprecht, 1989  |                        |

Compounds were classified as active, if they were reported to inhibit uptake of  $[^3\text{H}]$ - or  $[^{14}\text{C}]$ -labeled creatine ( $[^3\text{H}]/[^{14}\text{C}]\text{Cr}$ ) by  $\geq 25\%$ .

\* In these experiments, the compounds (i.e.  $\gamma$ -guanidino-butyrates and guanidino-acetates) did not cause any inhibition of creatine uptake. However, because other reports showed inhibition of creatine, these two compounds were classified as active and included in this table.

### Supplementary TABLE 2.

#### Compilation of compounds, which were tested for inhibition of creatine uptake and failed to suppress uptake by $\geq 20\%$ .

| Compound                                                         |               | Tested cell/tissue preparation | $[^3\text{H}]/[^{14}\text{C}]\text{Cr}$<br>$\mu\text{M}$ | Uptake<br>% of control     | Reference                  |
|------------------------------------------------------------------|---------------|--------------------------------|----------------------------------------------------------|----------------------------|----------------------------|
| Name                                                             | $\mu\text{M}$ |                                |                                                          |                            |                            |
| 1-methyl-hydantoin                                               | 1000          | Rat skeletal muscle            | 100                                                      | reported as non-inhibitory | Fitch et al., 1968         |
| 2,4'-amino-phenyl-6-methyl-benzene-thiazol-3',7'-disulfonic acid | 1000          | Human erythrocytes             | 1.7-4.2                                                  | 100                        | Ku and Passow, 1980        |
| 2,4-dinitro-phenol                                               | 170           | Uterine smooth muscle          | 50                                                       | 105                        | Daly and Seifter, 1980     |
| 2-amino-4-thiazole acetic acid                                   | 100           | Xenopus oocytes                | 20                                                       | 100                        | Dai et al., 1999           |
| 3-amino-1-2,4-triazole-5-carboxylic acid                         | 100           | Xenopus oocytes                | 20                                                       | 100                        | Dai et al., 1999           |
| 4,4'-diisothio-cyano-dihydro-stilbene-2,2'-disulfonic acid       | 1000          | Human erythrocytes             | 1.7-4.2                                                  | reported as non-inhibitory | Ku and Passow, 1980        |
| $\alpha$ -amino-gamma-guanidino-butyrates                        | 1000          | Hela cells                     | 0.5                                                      | 91                         | Saltarelli et al., 1996    |
| Alanine                                                          | 1000          | Hela cells                     | 0.5                                                      | 77                         | Saltarelli et al., 1996    |
|                                                                  | 1000          | Astroglia rich culture         | 10                                                       | 90                         | Möller and Hamprecht, 1989 |
|                                                                  | 2000          | Uterine smooth muscle          | 50                                                       | 81                         | Daly and Seifter, 1980     |
|                                                                  | 4000          | Macrophages                    | 21.7-43.4                                                | >90                        | Loike et al., 1986         |
| Arginine                                                         | 1000          | Rat skeletal muscle            | 100                                                      | reported as non-inhibitory | Fitch et al., 1968         |
|                                                                  |               | Astroglia rich culture         | 10                                                       | 76                         | Möller and Hamprecht, 1989 |
|                                                                  |               | Hela cells                     | 0.5                                                      | 104                        | Saltarelli et al., 1996    |
|                                                                  |               | TM-BBB4 cells                  | 9.1                                                      | 80                         | Ohtsuki et al., 2002       |
|                                                                  |               | TR-iBRB2 cells                 | 18.2                                                     | 86                         | Nakashima et al., 2004     |
|                                                                  |               | Hippocampal neurons            | 20                                                       | 100                        | Dodd et al., 2010          |
|                                                                  | 2000          | Uterine smooth muscle          | 50                                                       | 80                         | Daly and Seifter, 1980     |
|                                                                  | 4000          | Macrophages                    | 21.7-43.4                                                | 65                         | Loike et al., 1986         |
|                                                                  | 5000          | Cos-7 cells                    | 50                                                       | 100                        | Guimbal and Kilimann, 1993 |
| $\beta$ -Alanine                                                 | 1000          | Rat skeletal muscle            | 100                                                      | reported as non-inhibitory | Fitch et al., 1968         |
|                                                                  |               | Chicken enterocytes            | 1                                                        | 87                         | Peral et al., 2002         |
| Betaine                                                          | 1000          | Rat skeletal muscle            | 100                                                      | reported as non-inhibitory | Fitch et al., 1968         |
|                                                                  |               | Chicken enterocytes            | 1                                                        | 97                         | Peral et al., 2002         |
| Canavanine                                                       | 1000          | Rat skeletal muscle            | 100                                                      | reported as non-inhibitory | Fitch et al., 1968         |

|           |      |                     |     |     |                            |
|-----------|------|---------------------|-----|-----|----------------------------|
| Carnitine | 5000 | Cos-7 cells         | 50  | 100 | Guimbal and Kilimann, 1993 |
| Choline   | 1000 | Hela cells          | 0.5 | 117 | Saltarelli et al., 1996    |
|           |      | TM-BBB4 cells       | 9.1 | 75  | Ohtsuki et al., 2002       |
|           |      | Chicken enterocytes | 1   | 80  | Peral et al., 2002         |

Supplementary TABLE 2. Continued

| Compound                           |               | Tested cell/tissue preparation | $[^3\text{H}]/[^{14}\text{C}]\text{Cr}$<br>$\mu\text{M}$ | Uptake<br>% of control        | Reference                   |
|------------------------------------|---------------|--------------------------------|----------------------------------------------------------|-------------------------------|-----------------------------|
| Name                               | $\mu\text{M}$ |                                |                                                          |                               |                             |
| Citrulline                         | 1000          | Hela cells                     | 0.5                                                      | 96                            | Saltarelli et al., 1996     |
|                                    | 5000          | Cos-7 cells                    | 50                                                       | 100                           | Guimbal and Kilimann, 1993  |
| Creatinine                         | 1000          | Astroglia rich culture         | 10                                                       | 92                            | Möller and Hamprecht, 1989  |
|                                    |               | Hela cells                     | 0.5                                                      | 117                           | Saltarelli et al., 1996     |
|                                    |               | TM-BBB4 cells                  | 9.1                                                      | 83                            | Ohtsuki et al., 2002        |
|                                    |               | TR-iBRB2 cells                 | 18.2                                                     | 91                            | Nakashima et al., 2004      |
|                                    | 4000          | Macrophages                    | 21.7-43.4                                                | >90                           | Loike et al., 1986          |
|                                    | 5000          | Cos-7 cells                    | 50                                                       | 100                           | Guimbal, and Kilimann, 1993 |
| Cyano-guanidine                    | 50            | Rat skeletal muscle            | 0.21 $\mu\text{mol}$<br>injected i.p                     | 115                           | Fitch and Chevli, 1980      |
|                                    |               | Rat heart                      |                                                          | 122                           |                             |
| Cysteine                           | 1000          | Rat skeletal muscle            | 100                                                      | reported as<br>non-inhibitory | Fitch et al., 1968          |
| DL- $\alpha$ -guanidino-propionate | 50            | Rat skeletal muscle            | 0.21 $\mu\text{mol}$<br>injected i.p                     | 84                            | Fitch and Chevli, 1980      |
|                                    |               | Rat heart                      |                                                          | 81                            |                             |
|                                    | 2000          | Rat skeletal muscle            | 100                                                      | reported as<br>non-inhibitory | Fitch et al., 1968          |
| DL-guanidino-succinate             | 50            | Rat skeletal muscle            | 0.21 $\mu\text{mol}$<br>injected i.p                     | 97                            | Fitch and Chevli, 1980      |
|                                    |               | Rat heart                      |                                                          | 91                            |                             |
| Epoxy-creatine                     | 4000          | Macrophages                    | 21.7-43.4                                                | >90                           | Loike et al., 1986          |
| GABA                               | 1000          | Astroglia rich culture         | 10                                                       | 94                            | Möller and Hamprecht, 1989  |
|                                    |               | Hela cells                     | 0.5                                                      | 113                           | Saltarelli et al., 1996     |
|                                    |               | TM-BBB4 cells                  | 9.1                                                      | 89                            | Ohtsuki et al., 2002        |
|                                    |               | Chicken enterocytes            | 1                                                        | 80                            | Peral et al., 2002          |
|                                    |               | Rat ileum                      | 2                                                        | 85                            |                             |
|                                    |               | TR-iBRB2 cells                 | 18.2                                                     | 94                            | Nakashima et al., 2004      |
|                                    |               | Hippocampal neurons            | 20                                                       | 96                            | Dodd et al., 2010           |
|                                    | 5000          | Cos-7 cells                    | 50                                                       | 100                           | Guimbal, and Kilimann, 1993 |
| Glutamic acid                      | 1000          | Rat skeletal muscle            | 100                                                      | reported as<br>non-inhibitory | Fitch et al., 1968          |
|                                    | 4000          | Macrophages                    | 21.7-43.4                                                | >90                           | Loike et al., 1986          |
| Glutamine                          | 4000          | Macrophages                    | 21.7-43.4                                                | >90                           | Loike et al., 1986          |
|                                    | 1000          | Hela cells                     | 0.5                                                      | 108                           | Saltarelli et al., 1996     |
| Glucose                            | 1000          | Rat skeletal muscle            | 100                                                      | reported as<br>non-inhibitory | Fitch et al., 1968          |
|                                    | 0             |                                |                                                          |                               |                             |
| Glycine                            | 1000          | Rat skeletal muscle            | 100                                                      | reported as<br>non-inhibitory | Fitch et al., 1968          |
|                                    |               | Astroglia rich culture         | 10                                                       | 82                            | Möller and Hamprecht, 1989  |
|                                    |               | Hela cells                     | 0.5                                                      | 109                           | Saltarelli et al., 1996     |
|                                    |               | TM-BBB4 cells                  | 9.1                                                      | 81                            | Ohtsuki et al., 2002        |
|                                    |               | Chicken enterocytes            | 1                                                        | 96                            | Peral et al., 2002          |
|                                    |               | Rat ileum                      | 2                                                        | 97                            |                             |
|                                    | 2000          | Uterine smooth muscle          | 50                                                       | 84                            | Daly and Seifter, 1980      |
|                                    | 4000          | Macrophages                    | 21.7-43.4                                                | >90                           | Loike et al., 1986          |
| Guanidine                          | 1000          | Rat skeletal muscle            | 100                                                      | reported as<br>non-inhibitory | Fitch et al., 1968          |
| Guanidino-succinate                | 1000          | Hela cells                     | 0.5                                                      | 110                           | Saltarelli et al., 1996     |
| Hexanol                            | 8000          | Human erythrocytes             | 1.7-4.2                                                  | 80                            | Ku and Passow, 1980         |
| Histamine                          | 4000          | Macrophages                    | 21.7/43.4                                                | >90                           | Loike et al., 1986          |
| Isopropyl-urea                     | 1000          | Rat skeletal muscle            | 100                                                      | reported as<br>non-inhibitory | Fitch et al., 1968          |



Supplementary TABLE 2. Continued

| Compound                             |               | Tested cell/tissue preparation                 | $[^3\text{H}]/[^{14}\text{C}]\text{Cr}$<br>$\mu\text{M}$ | Uptake<br>% of control     | Reference                  |
|--------------------------------------|---------------|------------------------------------------------|----------------------------------------------------------|----------------------------|----------------------------|
| Name                                 | $\mu\text{M}$ |                                                |                                                          |                            |                            |
| Leucine                              | 1000          | Rat skeletal muscle                            | 100                                                      | reported as non-inhibitory | Fitch et al., 1968         |
|                                      |               | Uterine smooth muscle                          | 50                                                       | 82                         | Daly and Seifter, 1980     |
|                                      | 4000          | Macrophages                                    | 21.7/43.4                                                | >90                        | Loike et al., 1986         |
| Lysine                               | 4000          | Macrophages                                    | 21.7/43.4                                                | >90                        | Loike et al., 1986         |
| Methionine                           | 2000          | Rat skeletal muscle                            | 100                                                      | reported as non-inhibitory | Fitch et al., 1968         |
| N-amidino-benzamide                  | 1000          | Rat skeletal muscle                            | 100                                                      | reported as non-inhibitory | Fitch et al., 1968         |
| N,N-dimethyl-guanidine               | 1000          | Rat skeletal muscle                            | 100                                                      | reported as non-inhibitory | Fitch et al., 1968         |
| N-ethyl-N-amidino-glycine            | 50            | Rat skeletal muscle                            | 0.21 $\mu\text{mol}$<br>injected i.p.                    | 78                         | Fitch and Chevli, 1980     |
|                                      |               | Rat heart muscle                               |                                                          | 86                         |                            |
| N-ethyl-guanidino-acetic acid        | 1000          |                                                | 100                                                      | reported as non-inhibitory | Fitch et al., 1968         |
| N-methyl-N-amidino- $\beta$ -alanine | 50            | Rat skeletal muscle                            | 0.21 $\mu\text{M}$<br>injected i.p.                      | 91                         | Fitch and Chevli, 1980     |
|                                      |               | Rat heart                                      |                                                          | 97                         |                            |
| N-methyl-glycine                     | 1000          | Human erythrocytes                             | 1.7-4.2                                                  | reported as non-inhibitory | Ku and Passow, 1980        |
|                                      |               | Astroglia rich culture                         | 10                                                       | 100                        | Möller and Hamprecht, 1989 |
|                                      |               | Hela cells                                     | 0.5                                                      | 92                         | Saltarelli et al., 1996    |
|                                      | 2000          | Rat skeletal muscle                            | 100                                                      | reported as non-inhibitory | Fitch et al., 1968         |
| N-methyl-guanidine                   | 1000          | Rat skeletal muscle                            | 100                                                      | reported as non-inhibitory | Fitch et al., 1968         |
|                                      |               | Human erythrocytes                             | 1.7-4.2                                                  | 100                        | Ku and Passow, 1980        |
| Nipecotic acid                       | 1000          | Chicken enterocytes                            | 1                                                        | 72                         | Peral et al., 2002         |
|                                      | 20            |                                                |                                                          | 91                         |                            |
|                                      | 1000          | Rat ileum                                      | 2                                                        | 84                         |                            |
| Ornithine                            | 1000          | Rat skeletal muscle                            | 100                                                      | reported as non-inhibitory | Fitch et al., 1968         |
|                                      | 4000          | Macrophages                                    | 21.7-43.4                                                | 95                         | Loike et al., 1986         |
| Phenylalanine                        | 2000          | Uterine smooth muscle                          | 50                                                       | 86                         | Daly and Seifter, 1980     |
| Phospho-creatine                     | 1000          | Astroglia rich culture                         | 10                                                       | 99                         | Möller and Hamprecht, 1989 |
|                                      |               | Hela cells                                     | 0.5                                                      | 98                         | Saltarelli et al., 1996    |
|                                      |               | TM-BBB4 cells                                  | 9.1                                                      | 68                         | Ohtsuki et al., 2002       |
|                                      |               | Rat skeletal muscle giant sarcolemmal vesicles | 10                                                       | 102                        | Walzel et al., 2002        |
|                                      |               | TR-iBRB2 cells                                 | 18.2                                                     | 58                         | Nakashima et al., 2004     |
|                                      | 4000          | Macrophages                                    | 21.7-43.4                                                | >90                        | Loike et al., 1986         |
| Proline                              | 4000          | Macrophages                                    | 21.7-43.4                                                | >90                        | Loike et al., 1986         |
| Propylurea                           | 1000          | Rat skeletal muscle                            | 100                                                      | reported as non-inhibitory | Fitch et al., 1968         |
| Serine                               | 4000          | Macrophages                                    | 21.7-43.4                                                | >90                        | Loike et al., 1986         |
| Taurine                              | 1000          | Astroglia rich culture                         | 10                                                       | 92                         | Möller and Hamprecht, 1989 |
|                                      |               | Hela cells                                     | 0.5                                                      | 98                         | Saltarelli et al., 1996    |
|                                      |               | Chicken enterocytes                            | 1                                                        | 96                         | Peral et al., 2002         |
|                                      |               | Rat ileum                                      | 2                                                        | 80                         |                            |
|                                      |               | Rat skeletal muscle giant sarcolemmal vesicles | 10                                                       | 100                        | Walzel et al., 2002        |

Compounds were classified as non-inhibitory, if they were reported as non-inhibitory in the cited reference or if residual uptake in their presence was  $\geq 80\%$  of control creatine uptake (i.e., uptake measured in their absence). In some instances, individual references reported inhibition by  $>20\%$ . In these cases, the classification as inactive is based on the average inhibition.

### References to Tables 1 & 2:

- Al-Khawaja A, Haugaard AS, Marek A, Löffler R, Thiesen L, Santiveri M, Damgaard M, Bundgaard C, Frølund B, and Wellendorph P (2018) Pharmacological characterization of [ $^3\text{H}$ ]ATPCA as a substrate for studying the functional Role of the betaine/GABA transporter 1 and the creatine transporter. *ACS Chem Neurosci* **9**: 545–554. doi:10.1021/acschemneuro.7b00351.
- Dai W, Vinnakota S, Qian X, Kunze DL, and Sarkar, HK (1999). Molecular characterization of the human CRT-1 creatine transporter expressed in *Xenopus* oocytes. *Arch Biochem Biophys* **361**: 75–84. doi:10.1006/abbi.1998.0959.
- Daly MM, and Seifter S (1980) Uptake of creatine by cultured cells. *Arch Biochem Biophys* **203**: 317–324. doi:10.1016/0003-9861(80)90182-4.
- Dodd JR., Birch NP, Waldvogel HJ, and Christie DL (2010) Functional and immunocytochemical characterization of the creatine transporter in hippocampal neurons. *J Neurochem* **115**: 684–693. doi:10.1111/j.1471-4159.2010.06957.x.
- Dodd JR, Zheng T, and Christie DL (1999) Creatine accumulation and exchange by HEK293 cells stably expressing high levels of a creatine transporter. *Biochim Biophys Acta - Gen Subj* **1472**: 128–136. doi:10.1016/S0304-4165(99)00113-0.
- Fitch CD, and Chevli R (1980) Inhibition of creatine and phosphocreatine accumulation in skeletal muscle and heart. *Metabolism* **29**: 686–690. doi:10.1016/0026-0495(80)90115-8.
- Fitch CD, Shields RP, Payne WF, and Dacus JM (1968) Creatine metabolism in skeletal muscle. 3. Specificity of the creatine entry process. *J Biol Chem* **243**: 2024–2027.
- Guimbal C and Kilimann M (1993) A  $\text{Na}^+$ -dependent creatine transporter in rabbit brain, muscle, heart, and kidney. cDNA cloning and functional expression. *J Biol Chem* **268**: 8418–21.
- Ku CP, and Passow H (1980) Creatine and creatinine transport in old and young human red blood cells. *Biochim Biophys Acta - Biomembr* **600**: 212–227. doi:10.1016/0005-2736(80)90426-5.
- Loike JD., Somes M, and Silverstein SC (1986) Creatine uptake, metabolism, and efflux in human monocytes and macrophages. *Am J Physiol* **251**: C128–C135. doi:10.1152/ajpcell.1986.251.1.C128.
- Möller A, and Hamprecht B (1989). Creatine transport in cultured cells of rat and mouse brain. *J Neurochem* **52**: 544–550. doi:10.1111/j.1471-4159.1989.tb09154.x.
- Nakashima T, Tomi M, Katayama K, Tachikawa M, Watanabe M, Terasaki T and Hosoya K (2004) Blood-to-retina transport of creatine via creatine transporter (CRT) at the rat inner blood-retinal barrier. *J Neurochem* **89**: 1454–1461. doi:10.1111/j.1471-4159.2004.02437.x.
- Ohtsuki S, Tachikawa M, Takanaga H, Shimizu H, Watanabe M, Hosoya K, and Terasaki T (2002) The blood–brain barrier creatine transporter is a major pathway for supplying creatine to the brain. *J Cereb Blood Flow Metab* **22**, 1327–1335. doi:10.1097/01.WCB.0000033966.83623.7D.
- Peral MJ, García-Delgado M, Calonge ML, Durán JM, De La Horra MC, Wallimann T, Speer O, Ilundáin A (2002) Human, rat and chicken small intestinal  $\text{Na}^+$ - $\text{Cl}^-$ -creatine transporter: functional, molecular characterization and localization. *J Physiol* **545**: 133–144. doi:10.1113/jphysiol.2002.026377.
- Saltarelli MD, Bauman AL, Moore KR, Bradley CC, and Blakely RD (1996) Expression of the rat brain creatine transporter in situ and in transfected HeLa cells. *Dev Neurosci* **18**: 524–534. doi:10.1159/000111450.
- Sora I, Richman J, Santoro G, Wei HB, Wang Y, Vanderah T, Horvath R, Nguyen M, Waite S, Roeske WR, Yamamura HI (1994) The cloning and expression of a human creatine transporter. *Biochem Biophys Res Commun* **204**: 419–427. doi:10.1006/bbrc.1994.2475.
- Tosco M, Faelli A, Sironi C, Gastaldi G, and Orsenigo M N (2004). A creatine transporter is operative at the brush border level of the rat jejunal enterocyte. *J Membr Biol* **202**: 85–95. doi:10.1007/s00232-004-0721-8.
- Walzel B, Speer O, Boehm E, Kristiansen S, Chan S, Clarke K, Magyar JP, Richter EA, and Wallimann T (2002). New creatine transporter assay and identification of distinct creatine transporter isoforms in muscle. *Am J Physiol Metab* **283**: E390–E401. doi:10.1152/ajpendo.00428.2001.

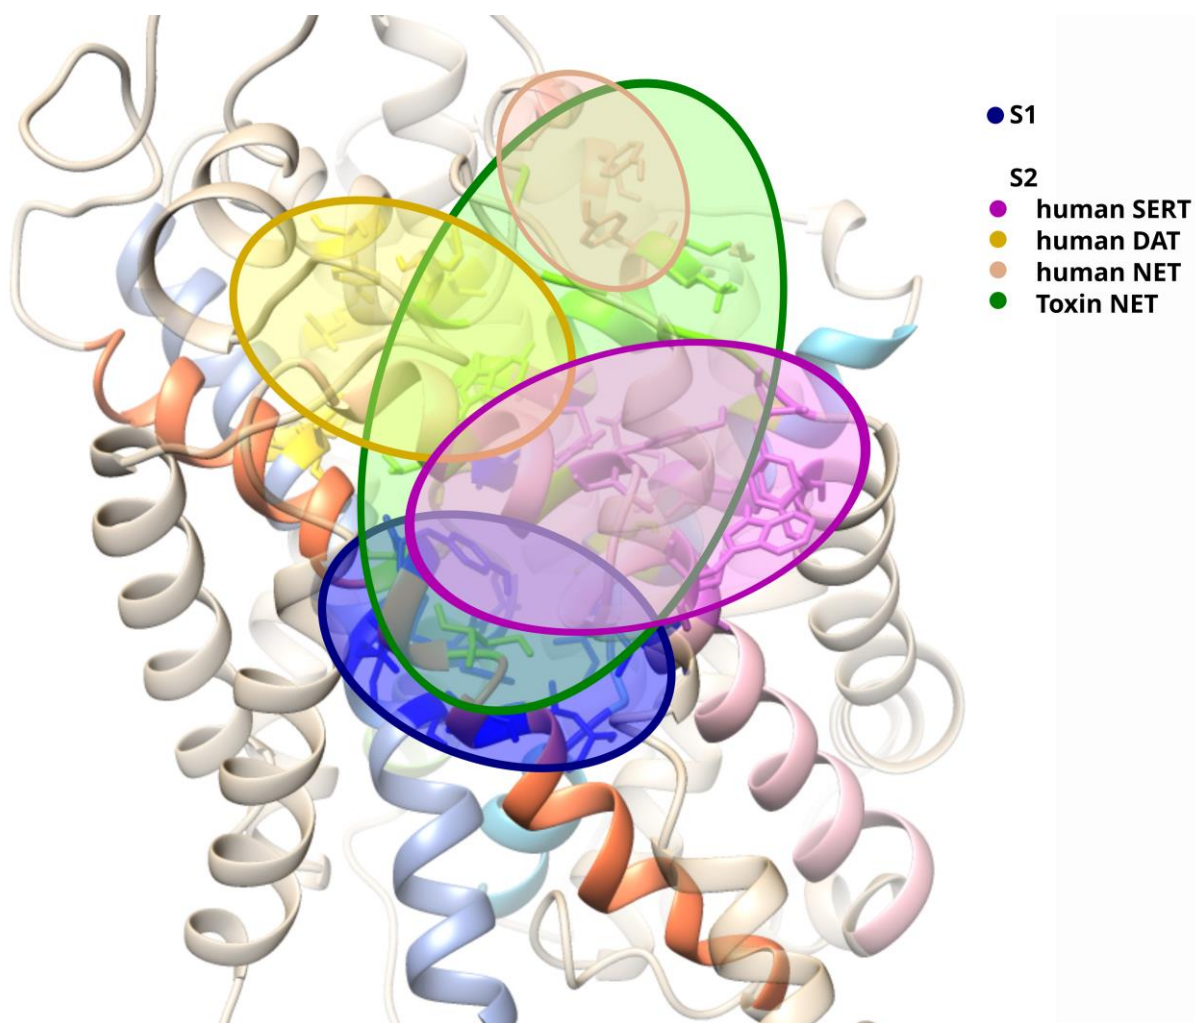

**Supplementary Figure 2. Mapping of ligand interaction sites, which were identified in the monoamine transporters of the human SLC6 family, onto the structure of the human creatine transporter-1.** The homology model structure of human CRT-1 is based on the structure of human SERT (Clarke et al., 2024). The helices are colored as in Fig. 3A. The blue ellipsoid indicates the orthosteric S1 site; the orchid, gold, salmon and green ellipsoids label the regions within the extracellular vestibule (collectively referred to as S2 site), where allosteric binding occurs in human SERT (PDB ID: 5I73, 5I75; Coleman et al., 2016; DOI: 10.1038/nature17629; PDB ID: 7LI9, 7LIA, 7MGW; Yang and Gouaux 2021; PDB ID: 7LWD; Plenge et al. 2021), in human DAT (PDB ID: 8VBY; Srivastava et al., 2024), in human NET (accessory site for norepinephrine in salmon and  $\chi$ -conotoxin MrlA analog in green; PDB ID: 8WGX, 8HFG, 8HFF, 8WTV, 8WTW; Hu et al., 2024), respectively. The pertinent amino acid side chains of CRT-1, which reside in each of these sites, are highlighted as appropriately colored sticks.

#### References to supplementary Figure 2:

- Coleman JA, Green EM, and Gouaux E (2016) X-ray structures and mechanism of the human serotonin transporter. *Nature* **532**: 334-339. doi: 10.1038/nature17629.
- Hu T, Yu Z, Zhao J, Meng Y, Salomon K, Bai Q, Wei Y, Zhang J, Xu S, Dai Q, Yu R, Yang B, Loland CJ, and Zhao Y (2024) Transport and inhibition mechanisms of the human noradrenaline transporter. *Nature* **632**: 930-937. doi: 10.1038/s41586-024-07638-z
- Plenge P, Yang D, Salomon K, Laursen L, Kalenderoglou IE, Newman AH, Gouaux E, Coleman JA, and Loland CJ (2021) The antidepressant drug vilazodone is an allosteric inhibitor of the serotonin transporter. *Nat Commun* **12**: 5063. doi: 10.1038/s41467-021-25363-3.
- Srivastava DK, Navratna V, Tosh DK, Chinn A, Sk MF, Tajkhorshid E, Jacobson KA, and Gouaux E (2024) Structure of the human dopamine transporter and mechanisms of inhibition. *Nature* **632**: 672-677. doi: 10.1038/s41586-024-07739-9.

Yang D, and Gouaux E (2021) Illumination of serotonin transporter mechanism and role of the allosteric site. *Sci Adv* 7:eabl3857. doi: 10.1126/sciadv.abl3857.

**PBD files:**

1) hCRT1\_Homology\_Model.pdb. – Coordinates of the homology model of human CRT1

2-11) PDB-files for docking of all compounds shown in Figures 3 and 4:

2) ATPCA.pdb

3) Compound1.pdb

4) GiDi1254.pdb

5) GiDi1257.pdb

6) MIPA572\_R.pdb

7) MIPA572\_S.pdb

8) MIPA573\_R.pdb

9) MIPA573\_S.pdb

10) MIPA574\_R.pdb

11) MIPA574\_S.pdb
